# Supplementary material for: Exploring the initial bond activations of PFAS on zero-valent iron
Source: Royal Society of Chemistry journal article supplement (doi:10.1039/d5cp02901e), 2025-11-27
Supplement: d5cp02901e1.pdf [file d5cp02901e1.pdf]

# **Supporting Information:**

## **Exploring the Initial Bond Activations of PFAS on Zero-valent Iron**

Glen R. Jenness,<sup>\*,†</sup> Elizabeth R. Zengel,<sup>‡,¶</sup> and Manoj K. Shukla<sup>\*,†</sup>

<sup>†</sup>*Environmental Laboratory, US Army Engineer Research and Development Center, 3909 Halls  
Ferry Road, Vicksburg, Mississippi 39180, United States*

<sup>‡</sup>*Department of Chemistry and Biochemistry, Old Dominion University, Norfolk, Virginia 23529,  
United States*

<sup>¶</sup>*Oak Ridge Institute for Science and Education (ORISE), 1299 Bethel Valley Rd, Oak Ridge,  
Tennessee 37830 United States*

E-mail: Glen.R.Jenness@usace.army.mil; Manoj.K.Shukla@usace.army.mil

# Contents

|          |                            |             |
|----------|----------------------------|-------------|
| <b>1</b> | <b>Bader Charges</b>       | <b>S-3</b>  |
| <b>2</b> | <b>Vibrational Spectra</b> | <b>S-13</b> |
| <b>3</b> | <b>XAS Spectra</b>         | <b>S-21</b> |

# 1 Bader Charges

Table S1: Bader charges for PFBA in the gas-phase.

| Atom            | Charge |
|-----------------|--------|
| C               | 1.61   |
| C $_{\alpha}$   | 1.18   |
| C $_{\beta}$    | 1.18   |
| C $_{\omega}$   | 1.82   |
| O <sub>OH</sub> | -1.04  |
| H               | 0.61   |
| O               | -1.03  |
| F $_{\alpha}$   | -0.57  |
| F $_{\alpha}$   | -0.58  |
| F $_{\beta}$    | -0.57  |
| F $_{\beta}$    | -0.57  |
| F $_{\omega}$   | -0.58  |
| F $_{\omega}$   | -0.58  |
| F $_{\omega}$   | -0.58  |

Table S2: Bader charges for reaction **R1** in the carbo binding mode.

| Atom               | Charge <sup>a</sup> |                |                |
|--------------------|---------------------|----------------|----------------|
|                    | Initial             | TS             | Final          |
| C                  | 0.82                | 1.01 ( 0.20)   | 1.11 ( 0.30)   |
| C <sub>α</sub>     | 1.12                | 1.12 ( −0.00)  | 1.13 ( 0.01)   |
| C <sub>β</sub>     | 1.18                | 1.22 ( 0.05)   | 1.22 ( 0.04)   |
| C <sub>ω</sub>     | 1.81                | 1.80 ( −0.01)  | 1.80 ( −0.02)  |
| O <sub>OH</sub>    | −1.07               | −1.01 ( 0.07)  | −1.06 ( 0.01)  |
| H                  | 0.60                | 0.18 ( −0.42)  | −0.34 ( −0.94) |
| O                  | −1.08               | −1.06 ( 0.02)  | −1.07 ( 0.00)  |
| F <sub>α</sub>     | −0.62               | −0.63 ( −0.00) | −0.63 ( −0.00) |
| F <sub>α</sub>     | −0.62               | −0.62 ( 0.01)  | −0.62 ( 0.00)  |
| F <sub>β</sub>     | −0.57               | −0.59 ( −0.02) | −0.57 ( 0.00)  |
| F <sub>β</sub>     | −0.58               | −0.58 ( 0.00)  | −0.58 ( 0.00)  |
| F <sub>ω</sub>     | −0.58               | −0.59 ( −0.00) | −0.58 ( 0.00)  |
| F <sub>ω</sub>     | −0.56               | −0.56 ( 0.01)  | −0.56 ( −0.00) |
| F <sub>ω</sub>     | −0.58               | −0.58 ( 0.00)  | −0.58 ( −0.00) |
| Total <sup>b</sup> | −0.76               | −0.87 ( −0.11) | −1.34 ( −0.59) |

<sup>a</sup> Values in parenthesis are the changes in the Bader charges with respect to the initial state.

<sup>b</sup> In order to maintain charge neutrality of the unit cell, the Fe(110) surface will have an equal and opposite charge.

Table S3: Bader charges for reaction **R2** in the carbo binding mode.

| Atom               | Charge <sup>a</sup> |                |                |
|--------------------|---------------------|----------------|----------------|
|                    | Initial             | TS             | Final          |
| C                  | 0.82                | 0.82 ( 0.00)   | 0.92 ( 0.11)   |
| C <sub>α</sub>     | 1.12                | 0.74 ( −0.38)  | 0.29 ( −0.83)  |
| C <sub>β</sub>     | 1.18                | 1.21 ( 0.03)   | 1.18 ( 0.00)   |
| C <sub>ω</sub>     | 1.81                | 1.79 ( −0.02)  | 1.78 ( −0.04)  |
| O <sub>OH</sub>    | −1.07               | −1.01 ( 0.06)  | −1.03 ( 0.04)  |
| H                  | 0.60                | 0.59 ( −0.01)  | 0.59 ( −0.01)  |
| O                  | −1.08               | −1.03 ( 0.04)  | −1.06 ( 0.02)  |
| F <sub>α</sub>     | −0.62               | −0.59 ( 0.03)  | −0.69 ( −0.07) |
| F <sub>α</sub>     | −0.62               | −0.63 ( −0.00) | −0.60 ( 0.03)  |
| F <sub>β</sub>     | −0.57               | −0.58 ( −0.00) | −0.60 ( −0.03) |
| F <sub>β</sub>     | −0.58               | −0.56 ( 0.02)  | −0.57 ( 0.01)  |
| F <sub>ω</sub>     | −0.58               | −0.59 ( −0.00) | −0.63 ( −0.04) |
| F <sub>ω</sub>     | −0.56               | −0.56 ( 0.00)  | −0.58 ( −0.01) |
| F <sub>ω</sub>     | −0.58               | −0.58 ( −0.00) | −0.60 ( −0.02) |
| Total <sup>b</sup> | −0.76               | −0.98 ( −0.22) | −1.61 ( −0.85) |

<sup>a</sup> Values in parenthesis are the changes in the Bader charges with respect to the initial state.

<sup>b</sup> In order to maintain charge neutrality of the unit cell, the Fe(110) surface will have an equal and opposite charge.

Table S4: Bader charges for reaction **R4** in the carbo binding mode.

| Atom               | Charge <sup>a</sup> |                |                |
|--------------------|---------------------|----------------|----------------|
|                    | Initial             | TS             | Final          |
| C                  | 0.82                | 0.88 ( 0.07)   | 0.84 ( 0.02)   |
| C <sub>α</sub>     | 1.12                | 1.08 ( −0.04)  | 0.68 ( −0.44)  |
| C <sub>β</sub>     | 1.18                | 1.19 ( 0.01)   | 1.20 ( 0.02)   |
| C <sub>ω</sub>     | 1.81                | 1.79 ( −0.02)  | 1.79 ( −0.02)  |
| O <sub>OH</sub>    | −1.07               | −1.10 ( −0.03) | −1.05 ( 0.02)  |
| H                  | 0.60                | 0.59 ( −0.00)  | 0.61 ( 0.01)   |
| O                  | −1.08               | −1.11 ( −0.03) | −1.10 ( −0.02) |
| F <sub>α</sub>     | −0.62               | −0.62 ( 0.00)  | −0.61 ( 0.01)  |
| F <sub>α</sub>     | −0.62               | −0.64 ( −0.02) | −0.60 ( 0.02)  |
| F <sub>β</sub>     | −0.57               | −0.57 ( 0.00)  | −0.61 ( −0.04) |
| F <sub>β</sub>     | −0.58               | −0.59 ( −0.01) | −0.61 ( −0.03) |
| F <sub>ω</sub>     | −0.58               | −0.58 ( 0.01)  | −0.58 ( 0.01)  |
| F <sub>ω</sub>     | −0.56               | −0.56 ( −0.00) | −0.57 ( −0.00) |
| F <sub>ω</sub>     | −0.58               | −0.58 ( 0.00)  | −0.59 ( −0.01) |
| Total <sup>b</sup> | −0.76               | −0.81 ( −0.05) | −1.20 ( −0.44) |

<sup>a</sup> Values in parenthesis are the changes in the Bader charges with respect to the initial state.<sup>b</sup> In order to maintain charge neutrality of the unit cell, the Fe(110) surface will have an equal and opposite charge.Table S5: Bader charges for reaction **R5** in the carbo binding mode.

| Atom               | Charge <sup>a</sup> |                |                |
|--------------------|---------------------|----------------|----------------|
|                    | Initial             | TS             | Final          |
| C                  | 0.82                | 0.26 ( −0.55)  | 0.13 ( −0.69)  |
| C <sub>α</sub>     | 1.12                | 1.09 ( −0.03)  | 1.09 ( −0.03)  |
| C <sub>β</sub>     | 1.18                | 1.22 ( 0.05)   | 1.20 ( 0.02)   |
| C <sub>ω</sub>     | 1.81                | 1.80 ( −0.01)  | 1.80 ( −0.02)  |
| O <sub>OH</sub>    | −1.07               | −1.10 ( −0.03) | −1.09 ( −0.02) |
| H                  | 0.60                | 0.61 ( 0.01)   | 0.61 ( 0.01)   |
| O                  | −1.08               | −0.93 ( 0.15)  | −0.97 ( 0.11)  |
| F <sub>α</sub>     | −0.62               | −0.63 ( −0.01) | −0.63 ( −0.00) |
| F <sub>α</sub>     | −0.62               | −0.59 ( 0.04)  | −0.63 ( −0.01) |
| F <sub>β</sub>     | −0.57               | −0.61 ( −0.03) | −0.57 ( 0.01)  |
| F <sub>β</sub>     | −0.58               | −0.59 ( −0.01) | −0.59 ( −0.01) |
| F <sub>ω</sub>     | −0.58               | −0.58 ( 0.00)  | −0.58 ( 0.01)  |
| F <sub>ω</sub>     | −0.56               | −0.57 ( −0.01) | −0.57 ( −0.01) |
| F <sub>ω</sub>     | −0.58               | −0.57 ( 0.01)  | −0.58 ( 0.00)  |
| Total <sup>b</sup> | −0.76               | −1.18 ( −0.43) | −1.38 ( −0.63) |

<sup>a</sup> Values in parenthesis are the changes in the Bader charges with respect to the initial state.<sup>b</sup> In order to maintain charge neutrality of the unit cell, the Fe(110) surface will have an equal and opposite charge.

Table S6: Bader charges for reaction **R6** in the carbo binding mode.

| Atom               | Charge <sup>a</sup> |                |                |
|--------------------|---------------------|----------------|----------------|
|                    | Initial             | TS             | Final          |
| C                  | 0.82                | 0.62 ( −0.20)  | 0.16 ( −0.66)  |
| C <sub>α</sub>     | 1.12                | 1.13 ( 0.01)   | 1.07 ( −0.06)  |
| C <sub>β</sub>     | 1.18                | 1.22 ( 0.05)   | 1.21 ( 0.03)   |
| C <sub>ω</sub>     | 1.81                | 1.82 ( 0.00)   | 1.83 ( 0.01)   |
| O <sub>OH</sub>    | −1.07               | −0.98 ( 0.10)  | −1.20 ( −0.12) |
| H                  | 0.60                | 0.56 ( −0.04)  | 0.61 ( 0.02)   |
| O                  | −1.08               | −1.11 ( −0.03) | −1.03 ( 0.05)  |
| F <sub>α</sub>     | −0.62               | −0.62 ( 0.01)  | −0.60 ( 0.03)  |
| F <sub>α</sub>     | −0.62               | −0.62 ( 0.00)  | −0.63 ( −0.01) |
| F <sub>β</sub>     | −0.57               | −0.59 ( −0.01) | −0.58 ( −0.01) |
| F <sub>β</sub>     | −0.58               | −0.60 ( −0.02) | −0.59 ( −0.01) |
| F <sub>ω</sub>     | −0.58               | −0.59 ( −0.00) | −0.59 ( −0.00) |
| F <sub>ω</sub>     | −0.56               | −0.56 ( 0.00)  | −0.58 ( −0.01) |
| F <sub>ω</sub>     | −0.58               | −0.58 ( −0.00) | −0.59 ( −0.01) |
| Total <sup>b</sup> | −0.76               | −0.89 ( −0.14) | −1.51 ( −0.75) |

<sup>a</sup> Values in parenthesis are the changes in the Bader charges with respect to the initial state.<sup>b</sup> In order to maintain charge neutrality of the unit cell, the Fe(110) surface will have an equal and opposite charge.Table S7: Bader charges for reaction **R7** in the carbo binding mode.

| Atom               | Charge <sup>a</sup> |                |                |
|--------------------|---------------------|----------------|----------------|
|                    | Initial             | TS             | Final          |
| C                  | 1.11                | 1.08 ( −0.03)  | 1.31 ( 0.20)   |
| C <sub>α</sub>     | 1.13                | 0.89 ( −0.24)  | 0.29 ( −0.84)  |
| C <sub>β</sub>     | 1.22                | 1.23 ( 0.01)   | 1.18 ( −0.04)  |
| C <sub>ω</sub>     | 1.80                | 1.82 ( 0.02)   | 1.78 ( −0.02)  |
| O <sub>OH</sub>    | −1.06               | −1.04 ( 0.02)  | −1.08 ( −0.02) |
| H                  | −0.34               | −0.34 ( 0.00)  | −0.32 ( 0.02)  |
| O                  | −1.07               | −1.06 ( 0.02)  | −1.07 ( 0.01)  |
| F <sub>α</sub>     | −0.63               | −0.54 ( 0.09)  | −0.68 ( −0.05) |
| F <sub>α</sub>     | −0.62               | −0.62 ( 0.00)  | −0.60 ( 0.02)  |
| F <sub>β</sub>     | −0.57               | −0.58 ( −0.01) | −0.61 ( −0.04) |
| F <sub>β</sub>     | −0.58               | −0.57 ( 0.01)  | −0.57 ( 0.01)  |
| F <sub>ω</sub>     | −0.58               | −0.58 ( −0.00) | −0.64 ( −0.06) |
| F <sub>ω</sub>     | −0.56               | −0.56 ( 0.00)  | −0.57 ( −0.01) |
| F <sub>ω</sub>     | −0.58               | −0.59 ( −0.00) | −0.59 ( −0.01) |
| Total <sup>b</sup> | −1.34               | −1.46 ( −0.11) | −2.18 ( −0.83) |

<sup>a</sup> Values in parenthesis are the changes in the Bader charges with respect to the initial state.<sup>b</sup> In order to maintain charge neutrality of the unit cell, the Fe(110) surface will have an equal and opposite charge.

Table S8: Bader charges for reaction **R9** in the carbo binding mode.

| Atom               | Charge <sup>a</sup> |                |                |
|--------------------|---------------------|----------------|----------------|
|                    | Initial             | TS             | Final          |
| C                  | 1.11                | 0.84 ( −0.27)  | 1.02 ( −0.09)  |
| C <sub>α</sub>     | 1.13                | 1.09 ( −0.04)  | 0.69 ( −0.43)  |
| C <sub>β</sub>     | 1.22                | 1.16 ( −0.05)  | 1.19 ( −0.02)  |
| C <sub>ω</sub>     | 1.80                | 1.81 ( 0.01)   | 1.78 ( −0.02)  |
| O <sub>OH</sub>    | −1.06               | −1.07 ( −0.01) | −1.02 ( 0.04)  |
| H                  | −0.34               | 0.62 ( 0.95)   | −0.35 ( −0.02) |
| O                  | −1.07               | −1.09 ( −0.01) | −1.06 ( 0.01)  |
| F <sub>α</sub>     | −0.63               | −0.64 ( −0.01) | −0.61 ( 0.02)  |
| F <sub>α</sub>     | −0.62               | −0.64 ( −0.01) | −0.62 ( 0.00)  |
| F <sub>β</sub>     | −0.57               | −0.57 ( −0.00) | −0.61 ( −0.04) |
| F <sub>β</sub>     | −0.58               | −0.58 ( 0.00)  | −0.60 ( −0.02) |
| F <sub>ω</sub>     | −0.58               | −0.58 ( −0.00) | −0.57 ( 0.01)  |
| F <sub>ω</sub>     | −0.56               | −0.57 ( −0.01) | −0.56 ( 0.00)  |
| F <sub>ω</sub>     | −0.58               | −0.57 ( 0.01)  | −0.58 ( −0.00) |
| Total <sup>b</sup> | −1.34               | −0.78 ( 0.56)  | −1.90 ( −0.56) |

<sup>a</sup> Values in parenthesis are the changes in the Bader charges with respect to the initial state.<sup>b</sup> In order to maintain charge neutrality of the unit cell, the Fe(110) surface will have an equal and opposite charge.Table S9: Bader charges for reaction **R10** in the carbo binding mode.

| Atom               | Charge <sup>a</sup> |                |                |
|--------------------|---------------------|----------------|----------------|
|                    | Initial             | TS             | Final          |
| C                  | 1.11                | 0.83 ( −0.28)  | 0.51 ( −0.61)  |
| C <sub>α</sub>     | 1.13                | 1.12 ( −0.01)  | 1.09 ( −0.04)  |
| C <sub>β</sub>     | 1.22                | 1.22 ( 0.00)   | 1.23 ( 0.02)   |
| C <sub>ω</sub>     | 1.80                | 1.80 ( 0.00)   | 1.82 ( 0.02)   |
| O <sub>OH</sub>    | −1.06               | −1.09 ( −0.03) | −1.05 ( 0.01)  |
| H                  | −0.34               | −0.34 ( 0.00)  | −0.35 ( −0.01) |
| O                  | −1.07               | −0.91 ( 0.16)  | −0.96 ( 0.11)  |
| F <sub>α</sub>     | −0.63               | −0.62 ( 0.00)  | −0.63 ( 0.00)  |
| F <sub>α</sub>     | −0.62               | −0.62 ( 0.00)  | −0.62 ( 0.00)  |
| F <sub>β</sub>     | −0.57               | −0.57 ( −0.00) | −0.59 ( −0.02) |
| F <sub>β</sub>     | −0.58               | −0.58 ( −0.00) | −0.59 ( −0.01) |
| F <sub>ω</sub>     | −0.58               | −0.58 ( 0.00)  | −0.58 ( 0.00)  |
| F <sub>ω</sub>     | −0.56               | −0.57 ( −0.00) | −0.58 ( −0.02) |
| F <sub>ω</sub>     | −0.58               | −0.58 ( 0.00)  | −0.58 ( −0.00) |
| Total <sup>b</sup> | −1.34               | −1.50 ( −0.15) | −1.88 ( −0.54) |

<sup>a</sup> Values in parenthesis are the changes in the Bader charges with respect to the initial state.<sup>b</sup> In order to maintain charge neutrality of the unit cell, the Fe(110) surface will have an equal and opposite charge.

Table S10: Bader charges for reaction **R1** in the flat binding mode.

| Atom               | Charge <sup>a</sup> |                |                |
|--------------------|---------------------|----------------|----------------|
|                    | Initial             | TS             | Final          |
| C                  | 1.55                | 1.58 ( 0.03)   | 1.63 ( 0.08)   |
| C <sub>α</sub>     | 1.23                | 1.22 ( −0.01)  | 1.19 ( −0.05)  |
| C <sub>β</sub>     | 1.15                | 1.16 ( 0.02)   | 1.16 ( 0.01)   |
| C <sub>ω</sub>     | 1.83                | 1.81 ( −0.02)  | 1.83 ( −0.00)  |
| O <sub>OH</sub>    | −1.07               | −1.04 ( 0.03)  | −1.14 ( −0.07) |
| H                  | 0.53                | 0.31 ( −0.22)  | −0.36 ( −0.89) |
| O                  | −1.18               | −1.18 ( 0.00)  | −1.13 ( 0.05)  |
| F <sub>α</sub>     | −0.59               | −0.58 ( 0.01)  | −0.58 ( 0.00)  |
| F <sub>α</sub>     | −0.57               | −0.58 ( −0.01) | −0.58 ( −0.01) |
| F <sub>β</sub>     | −0.63               | −0.62 ( 0.01)  | −0.61 ( 0.02)  |
| F <sub>β</sub>     | −0.57               | −0.57 ( 0.00)  | −0.57 ( 0.01)  |
| F <sub>ω</sub>     | −0.60               | −0.60 ( 0.00)  | −0.60 ( 0.01)  |
| F <sub>ω</sub>     | −0.57               | −0.55 ( 0.02)  | −0.58 ( −0.01) |
| F <sub>ω</sub>     | −0.58               | −0.58 ( 0.00)  | −0.58 ( 0.00)  |
| Total <sup>b</sup> | −0.07               | −0.23 ( −0.15) | −0.91 ( −0.84) |

<sup>a</sup> Values in parenthesis are the changes in the Bader charges with respect to the initial state.

<sup>b</sup> In order to maintain charge neutrality of the unit cell, the Fe(110) surface will have an equal and opposite charge.

Table S11: Bader charges for reaction **R2** in the flat binding mode.

| Atom               | Charge <sup>a</sup> |                |                |
|--------------------|---------------------|----------------|----------------|
|                    | Initial             | TS             | Final          |
| C                  | 1.55                | 1.36 ( −0.19)  | 1.17 ( −0.38)  |
| C <sub>α</sub>     | 1.23                | 0.86 ( −0.38)  | 0.56 ( −0.68)  |
| C <sub>β</sub>     | 1.15                | 1.19 ( 0.04)   | 1.15 ( 0.00)   |
| C <sub>ω</sub>     | 1.83                | 1.78 ( −0.05)  | 1.77 ( −0.06)  |
| O <sub>OH</sub>    | −1.07               | −1.04 ( 0.03)  | −1.07 ( 0.00)  |
| H                  | 0.53                | 0.56 ( 0.03)   | 0.52 ( −0.01)  |
| O                  | −1.18               | −1.17 ( 0.02)  | −1.17 ( 0.01)  |
| F <sub>α</sub>     | −0.59               | −0.59 ( −0.00) | −0.67 ( −0.09) |
| F <sub>α</sub>     | −0.57               | −0.57 ( 0.00)  | −0.57 ( 0.00)  |
| F <sub>β</sub>     | −0.63               | −0.62 ( 0.02)  | −0.62 ( 0.02)  |
| F <sub>β</sub>     | −0.57               | −0.57 ( 0.00)  | −0.57 ( −0.00) |
| F <sub>ω</sub>     | −0.60               | −0.62 ( −0.02) | −0.60 ( 0.00)  |
| F <sub>ω</sub>     | −0.57               | −0.56 ( 0.01)  | −0.58 ( −0.01) |
| F <sub>ω</sub>     | −0.58               | −0.58 ( 0.00)  | −0.58 ( −0.00) |
| Total <sup>b</sup> | −0.07               | −0.55 ( −0.48) | −1.25 ( −1.18) |

<sup>a</sup> Values in parenthesis are the changes in the Bader charges with respect to the initial state.

<sup>b</sup> In order to maintain charge neutrality of the unit cell, the Fe(110) surface will have an equal and opposite charge.



Table S12: Bader charges for reaction **R3** in the flat binding mode.

| Atom               | Charge <sup>a</sup> |                |                |
|--------------------|---------------------|----------------|----------------|
|                    | Initial             | TS             | Final          |
| C                  | 1.55                | 1.54 ( −0.01)  | 0.91 ( −0.64)  |
| C <sub>α</sub>     | 1.23                | 1.23 ( −0.01)  | 1.10 ( −0.13)  |
| C <sub>β</sub>     | 1.15                | 1.06 ( −0.09)  | 0.27 ( −0.88)  |
| C <sub>ω</sub>     | 1.83                | 1.85 ( 0.02)   | 1.67 ( −0.16)  |
| O <sub>OH</sub>    | −1.07               | −1.08 ( −0.01) | −1.06 ( 0.01)  |
| H                  | 0.53                | 0.54 ( 0.01)   | 0.57 ( 0.04)   |
| O                  | −1.18               | −1.19 ( −0.00) | −1.05 ( 0.13)  |
| F <sub>α</sub>     | −0.59               | −0.58 ( 0.00)  | −0.62 ( −0.03) |
| F <sub>α</sub>     | −0.57               | −0.58 ( −0.01) | −0.58 ( −0.01) |
| F <sub>β</sub>     | −0.63               | −0.56 ( 0.07)  | −0.69 ( −0.06) |
| F <sub>β</sub>     | −0.57               | −0.57 ( −0.00) | −0.60 ( −0.03) |
| F <sub>ω</sub>     | −0.60               | −0.61 ( −0.00) | −0.61 ( −0.01) |
| F <sub>ω</sub>     | −0.57               | −0.58 ( −0.01) | −0.62 ( −0.05) |
| F <sub>ω</sub>     | −0.58               | −0.58 ( 0.00)  | −0.57 ( 0.02)  |
| Total <sup>b</sup> | −0.07               | −0.12 ( −0.04) | −1.87 ( −1.79) |

<sup>a</sup> Values in parenthesis are the changes in the Bader charges with respect to the initial state.

<sup>b</sup> In order to maintain charge neutrality of the unit cell, the Fe(110) surface will have an equal and opposite charge.

Table S13: Bader charges for reaction **R4** in the flat binding mode.

| Atom               | Charge <sup>a</sup> |                |                |
|--------------------|---------------------|----------------|----------------|
|                    | Initial             | TS             | Final          |
| C                  | 1.55                | 1.37 ( −0.18)  | 1.26 ( −0.29)  |
| C <sub>α</sub>     | 1.23                | 0.78 ( −0.46)  | 0.80 ( −0.43)  |
| C <sub>β</sub>     | 1.15                | 1.12 ( −0.03)  | 1.13 ( −0.01)  |
| C <sub>ω</sub>     | 1.83                | 1.81 ( −0.02)  | 1.77 ( −0.06)  |
| O <sub>OH</sub>    | −1.07               | −1.08 ( −0.01) | −1.07 ( −0.00) |
| H                  | 0.53                | 0.47 ( −0.06)  | 0.47 ( −0.06)  |
| O                  | −1.18               | −1.21 ( −0.02) | −1.19 ( −0.00) |
| F <sub>α</sub>     | −0.59               | −0.60 ( −0.02) | −0.61 ( −0.02) |
| F <sub>α</sub>     | −0.57               | −0.59 ( −0.02) | −0.61 ( −0.04) |
| F <sub>β</sub>     | −0.63               | −0.62 ( 0.01)  | −0.62 ( 0.01)  |
| F <sub>β</sub>     | −0.57               | −0.58 ( −0.01) | −0.56 ( 0.01)  |
| F <sub>ω</sub>     | −0.60               | −0.65 ( −0.04) | −0.63 ( −0.03) |
| F <sub>ω</sub>     | −0.57               | −0.60 ( −0.03) | −0.60 ( −0.03) |
| F <sub>ω</sub>     | −0.58               | −0.57 ( 0.01)  | −0.56 ( 0.02)  |
| Total <sup>b</sup> | −0.07               | −0.95 ( −0.88) | −1.02 ( −0.94) |

<sup>a</sup> Values in parenthesis are the changes in the Bader charges with respect to the initial state.

<sup>b</sup> In order to maintain charge neutrality of the unit cell, the Fe(110) surface will have an equal and opposite charge.

Table S14: Bader charges for reaction **R5** in the flat binding mode.

| Atom               | Charge <sup>a</sup> |                |                |
|--------------------|---------------------|----------------|----------------|
|                    | Initial             | TS             | Final          |
| C                  | 1.55                | 0.54 ( −1.01)  | 0.33 ( −1.22)  |
| C <sub>α</sub>     | 1.23                | 1.14 ( −0.09)  | 1.11 ( −0.13)  |
| C <sub>β</sub>     | 1.15                | 1.20 ( 0.05)   | 1.18 ( 0.03)   |
| C <sub>ω</sub>     | 1.83                | 1.79 ( −0.04)  | 1.80 ( −0.02)  |
| O <sub>OH</sub>    | −1.07               | −1.06 ( 0.01)  | −1.06 ( 0.01)  |
| H                  | 0.53                | 0.57 ( 0.04)   | 0.57 ( 0.04)   |
| O                  | −1.18               | −0.93 ( 0.25)  | −0.97 ( 0.21)  |
| F <sub>α</sub>     | −0.59               | −0.64 ( −0.06) | −0.64 ( −0.06) |
| F <sub>α</sub>     | −0.57               | −0.57 ( −0.01) | −0.58 ( −0.01) |
| F <sub>β</sub>     | −0.63               | −0.63 ( 0.00)  | −0.63 ( −0.00) |
| F <sub>β</sub>     | −0.57               | −0.59 ( −0.02) | −0.57 ( −0.00) |
| F <sub>ω</sub>     | −0.60               | −0.60 ( 0.01)  | −0.62 ( −0.02) |
| F <sub>ω</sub>     | −0.57               | −0.56 ( 0.01)  | −0.57 ( −0.00) |
| F <sub>ω</sub>     | −0.58               | −0.57 ( 0.01)  | −0.57 ( 0.01)  |
| Total <sup>b</sup> | −0.07               | −0.92 ( −0.85) | −1.24 ( −1.16) |

<sup>a</sup> Values in parenthesis are the changes in the Bader charges with respect to the initial state.<sup>b</sup> In order to maintain charge neutrality of the unit cell, the Fe(110) surface will have an equal and opposite charge.Table S15: Bader charges for reaction **R6** in the flat binding mode.

| Atom               | Charge <sup>a</sup> |                |                |
|--------------------|---------------------|----------------|----------------|
|                    | Initial             | TS             | Final          |
| C                  | 1.55                | 0.99 ( −0.56)  | 0.74 ( −0.81)  |
| C <sub>α</sub>     | 1.23                | 1.18 ( −0.06)  | 1.16 ( −0.07)  |
| C <sub>β</sub>     | 1.15                | 1.20 ( 0.05)   | 1.14 ( −0.00)  |
| C <sub>ω</sub>     | 1.83                | 1.79 ( −0.04)  | 1.79 ( −0.04)  |
| O <sub>OH</sub>    | −1.07               | −0.98 ( 0.09)  | −1.00 ( 0.07)  |
| H                  | 0.53                | 0.60 ( 0.07)   | 0.14 ( −0.39)  |
| O                  | −1.18               | −1.13 ( 0.05)  | −1.14 ( 0.04)  |
| F <sub>α</sub>     | −0.59               | −0.57 ( 0.01)  | −0.59 ( −0.00) |
| F <sub>α</sub>     | −0.57               | −0.59 ( −0.02) | −0.57 ( −0.00) |
| F <sub>β</sub>     | −0.63               | −0.62 ( 0.02)  | −0.62 ( 0.01)  |
| F <sub>β</sub>     | −0.57               | −0.57 ( 0.00)  | −0.56 ( 0.01)  |
| F <sub>ω</sub>     | −0.60               | −0.61 ( −0.00) | −0.61 ( −0.00) |
| F <sub>ω</sub>     | −0.57               | −0.58 ( −0.01) | −0.58 ( −0.02) |
| F <sub>ω</sub>     | −0.58               | −0.57 ( 0.01)  | −0.56 ( 0.02)  |
| Total <sup>b</sup> | −0.07               | −0.46 ( −0.39) | −1.26 ( −1.19) |

<sup>a</sup> Values in parenthesis are the changes in the Bader charges with respect to the initial state.<sup>b</sup> In order to maintain charge neutrality of the unit cell, the Fe(110) surface will have an equal and opposite charge.

Table S16: Bader charges for reaction **R7** in the flat binding mode.

| Atom               | Charge <sup>a</sup> |                |                |
|--------------------|---------------------|----------------|----------------|
|                    | Initial             | TS             | Final          |
| C                  | 1.63                | 1.56 ( −0.08)  | 1.19 ( −0.45)  |
| C <sub>α</sub>     | 1.19                | 0.89 ( −0.30)  | 0.56 ( −0.63)  |
| C <sub>β</sub>     | 1.16                | 1.22 ( 0.06)   | 1.15 ( −0.01)  |
| C <sub>ω</sub>     | 1.83                | 1.82 ( −0.00)  | 1.78 ( −0.05)  |
| O <sub>OH</sub>    | −1.14               | −1.11 ( 0.02)  | −1.14 ( −0.00) |
| H                  | −0.36               | −0.36 ( −0.00) | −0.36 ( −0.00) |
| O                  | −1.13               | −1.16 ( −0.03) | −1.15 ( −0.02) |
| F <sub>α</sub>     | −0.58               | −0.48 ( 0.11)  | −0.69 ( −0.11) |
| F <sub>α</sub>     | −0.58               | −0.56 ( 0.02)  | −0.58 ( 0.00)  |
| F <sub>β</sub>     | −0.61               | −0.57 ( 0.04)  | −0.62 ( −0.01) |
| F <sub>β</sub>     | −0.57               | −0.57 ( −0.00) | −0.57 ( −0.00) |
| F <sub>ω</sub>     | −0.60               | −0.60 ( −0.00) | −0.60 ( −0.01) |
| F <sub>ω</sub>     | −0.58               | −0.57 ( 0.01)  | −0.56 ( 0.02)  |
| F <sub>ω</sub>     | −0.58               | −0.58 ( −0.00) | −0.58 ( 0.00)  |
| Total <sup>b</sup> | −0.91               | −1.07 ( −0.16) | −2.16 ( −1.25) |

<sup>a</sup> Values in parenthesis are the changes in the Bader charges with respect to the initial state.

<sup>b</sup> In order to maintain charge neutrality of the unit cell, the Fe(110) surface will have an equal and opposite charge.

Table S17: Bader charges for reaction **R8** in the flat binding mode.

| Atom               | Charge <sup>a</sup> |                |                |
|--------------------|---------------------|----------------|----------------|
|                    | Initial             | TS             | Final          |
| C                  | 1.63                | 1.64 ( 0.00)   | 1.08 ( −0.55)  |
| C <sub>α</sub>     | 1.19                | 1.20 ( 0.01)   | 1.14 ( −0.05)  |
| C <sub>β</sub>     | 1.16                | 0.80 ( −0.36)  | 0.24 ( −0.92)  |
| C <sub>ω</sub>     | 1.83                | 1.82 ( −0.00)  | 1.71 ( −0.11)  |
| O <sub>OH</sub>    | −1.14               | −1.14 ( −0.00) | −1.11 ( 0.03)  |
| H                  | −0.36               | −0.36 ( −0.00) | −0.35 ( 0.01)  |
| O                  | −1.13               | −1.13 ( 0.00)  | −1.03 ( 0.10)  |
| F <sub>α</sub>     | −0.58               | −0.58 ( 0.01)  | −0.60 ( −0.02) |
| F <sub>α</sub>     | −0.58               | −0.58 ( 0.00)  | −0.57 ( 0.01)  |
| F <sub>β</sub>     | −0.61               | −0.61 ( 0.01)  | −0.68 ( −0.07) |
| F <sub>β</sub>     | −0.57               | −0.56 ( 0.01)  | −0.59 ( −0.02) |
| F <sub>ω</sub>     | −0.60               | −0.59 ( 0.00)  | −0.62 ( −0.03) |
| F <sub>ω</sub>     | −0.58               | −0.59 ( −0.01) | −0.62 ( −0.04) |
| F <sub>ω</sub>     | −0.58               | −0.56 ( 0.02)  | −0.58 ( −0.01) |
| Total <sup>b</sup> | −0.91               | −1.23 ( −0.32) | −2.57 ( −1.66) |

<sup>a</sup> Values in parenthesis are the changes in the Bader charges with respect to the initial state.

<sup>b</sup> In order to maintain charge neutrality of the unit cell, the Fe(110) surface will have an equal and opposite charge.

Table S18: Bader charges for reaction **R9** in the flat binding mode.

| Atom               | Charge <sup>a</sup> |                |                |
|--------------------|---------------------|----------------|----------------|
|                    | Initial             | TS             | Final          |
| C                  | 1.63                | 1.12 ( −0.51)  | 1.04 ( −0.59)  |
| C <sub>α</sub>     | 1.19                | 0.82 ( −0.36)  | 0.82 ( −0.37)  |
| C <sub>β</sub>     | 1.16                | 1.12 ( −0.04)  | 1.13 ( −0.03)  |
| C <sub>ω</sub>     | 1.83                | 1.81 ( −0.02)  | 1.77 ( −0.06)  |
| O <sub>OH</sub>    | −1.14               | −1.09 ( 0.05)  | −1.04 ( 0.10)  |
| H                  | −0.36               | −0.35 ( 0.01)  | −0.35 ( 0.01)  |
| O                  | −1.13               | −1.02 ( 0.11)  | −1.06 ( 0.08)  |
| F <sub>α</sub>     | −0.58               | −0.61 ( −0.03) | −0.61 ( −0.03) |
| F <sub>α</sub>     | −0.58               | −0.61 ( −0.03) | −0.60 ( −0.03) |
| F <sub>β</sub>     | −0.61               | −0.65 ( −0.03) | −0.64 ( −0.02) |
| F <sub>β</sub>     | −0.57               | −0.57 ( −0.01) | −0.57 ( −0.00) |
| F <sub>ω</sub>     | −0.60               | −0.64 ( −0.04) | −0.64 ( −0.04) |
| F <sub>ω</sub>     | −0.58               | −0.60 ( −0.02) | −0.56 ( 0.02)  |
| F <sub>ω</sub>     | −0.58               | −0.57 ( 0.00)  | −0.57 ( 0.00)  |
| Total <sup>b</sup> | −0.91               | −1.84 ( −0.92) | −1.88 ( −0.97) |

<sup>a</sup> Values in parenthesis are the changes in the Bader charges with respect to the initial state.

<sup>b</sup> In order to maintain charge neutrality of the unit cell, the Fe(110) surface will have an equal and opposite charge.

Table S19: Bader charges for reaction **R10** in the flat binding mode.

| Atom               | Charge <sup>a</sup> |                |                |
|--------------------|---------------------|----------------|----------------|
|                    | Initial             | TS             | Final          |
| C                  | 1.63                | 0.74 ( −0.89)  | 0.14 ( −1.49)  |
| C <sub>α</sub>     | 1.19                | 1.19 ( −0.00)  | 1.15 ( −0.03)  |
| C <sub>β</sub>     | 1.16                | 1.19 ( 0.03)   | 1.21 ( 0.05)   |
| C <sub>ω</sub>     | 1.83                | 1.79 ( −0.04)  | 1.79 ( −0.04)  |
| O <sub>OH</sub>    | −1.14               | −1.10 ( 0.04)  | −1.03 ( 0.10)  |
| H                  | −0.36               | −0.35 ( 0.00)  | −0.33 ( 0.02)  |
| O                  | −1.13               | −0.92 ( 0.21)  | −0.94 ( 0.20)  |
| F <sub>α</sub>     | −0.58               | −0.61 ( −0.03) | −0.63 ( −0.04) |
| F <sub>α</sub>     | −0.58               | −0.59 ( −0.01) | −0.58 ( −0.00) |
| F <sub>β</sub>     | −0.61               | −0.58 ( 0.03)  | −0.61 ( 0.00)  |
| F <sub>β</sub>     | −0.57               | −0.57 ( −0.01) | −0.58 ( −0.02) |
| F <sub>ω</sub>     | −0.60               | −0.59 ( 0.00)  | −0.60 ( 0.00)  |
| F <sub>ω</sub>     | −0.58               | −0.56 ( 0.02)  | −0.56 ( 0.02)  |
| F <sub>ω</sub>     | −0.58               | −0.57 ( 0.01)  | −0.58 ( 0.00)  |
| Total <sup>b</sup> | −0.91               | −1.54 ( −0.62) | −2.14 ( −1.23) |

<sup>a</sup> Values in parenthesis are the changes in the Bader charges with respect to the initial state.

<sup>b</sup> In order to maintain charge neutrality of the unit cell, the Fe(110) surface will have an equal and opposite charge.

## 2 Vibrational Spectra

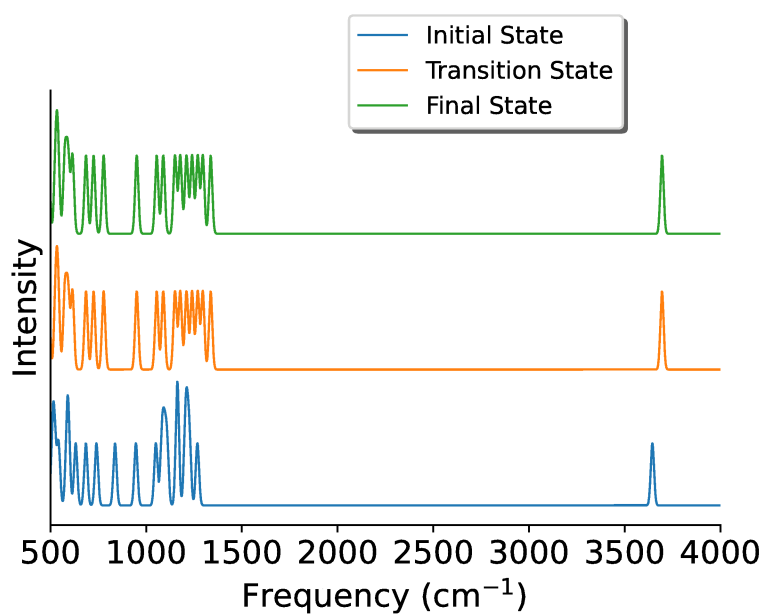

Figure S1: Vibrational spectra of the initial, transition, and final state for reaction **R2** in the carbo binding mode.

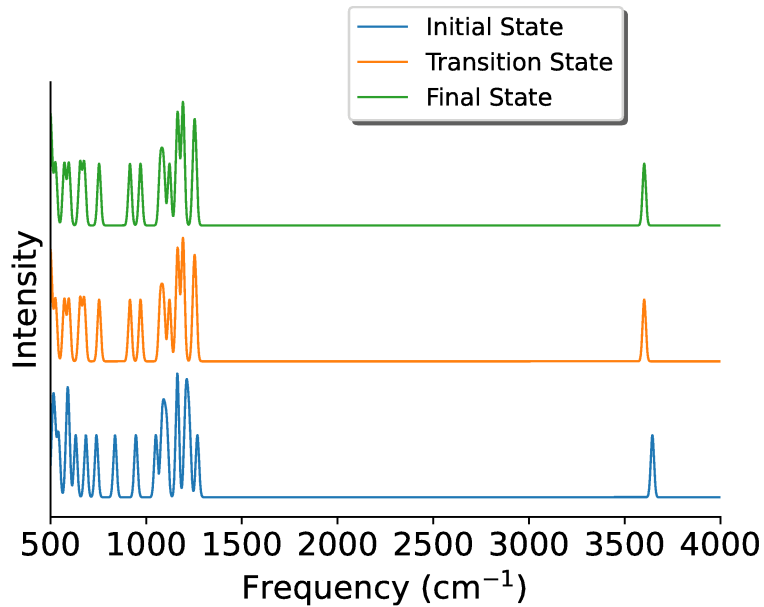

Figure S2: Vibrational spectra of the initial, transition, and final state for reaction **R4** in the carbo binding mode.

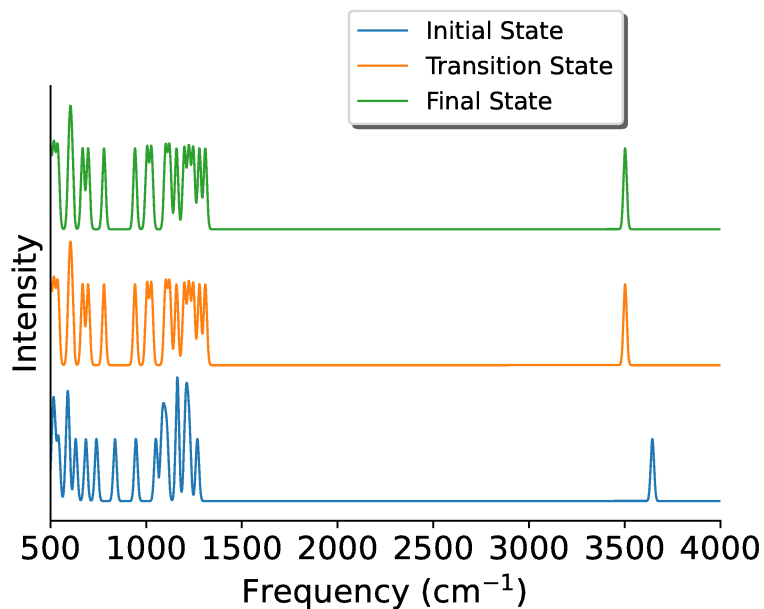

Figure S3: Vibrational spectra of the initial, transition, and final state for reaction **R5** in the carbo binding mode.

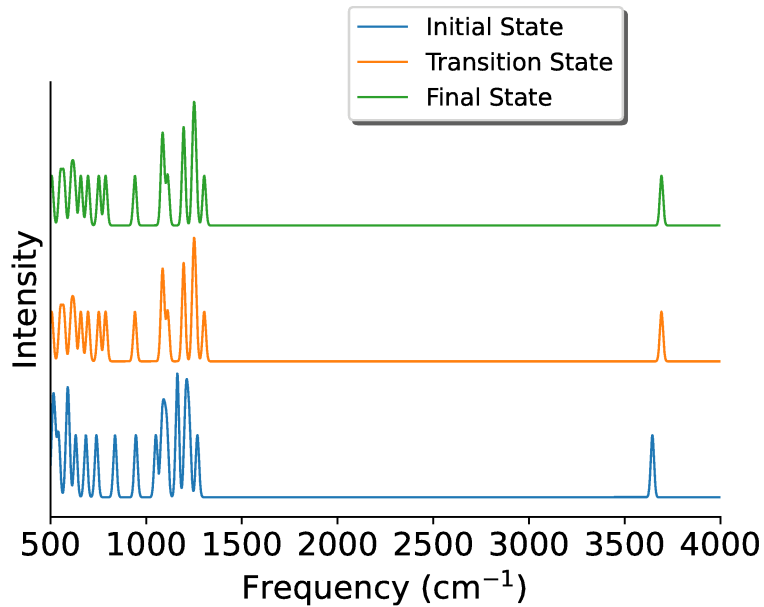

Figure S4: Vibrational spectra of the initial, transition, and final state for reaction **R6** in the carbo binding mode.

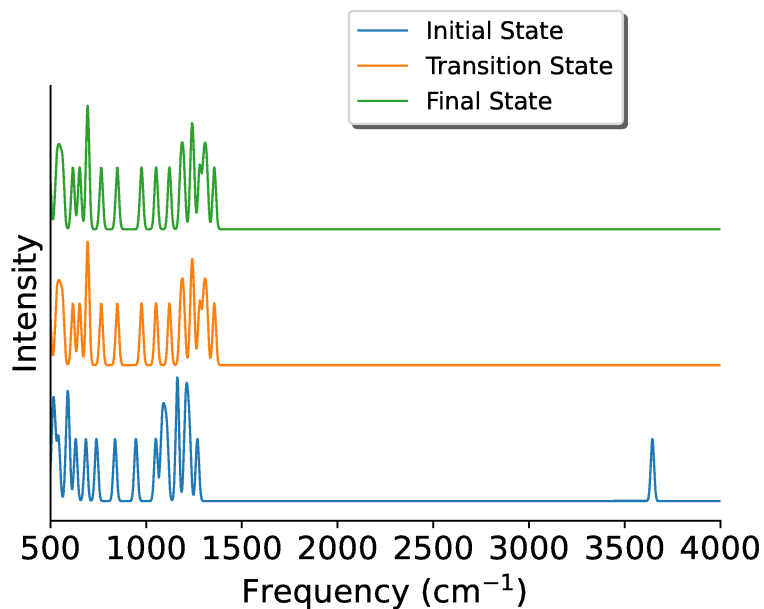

Figure S5: Vibrational spectra of the initial, transition, and final state for reaction **R8** in the carbo binding mode.

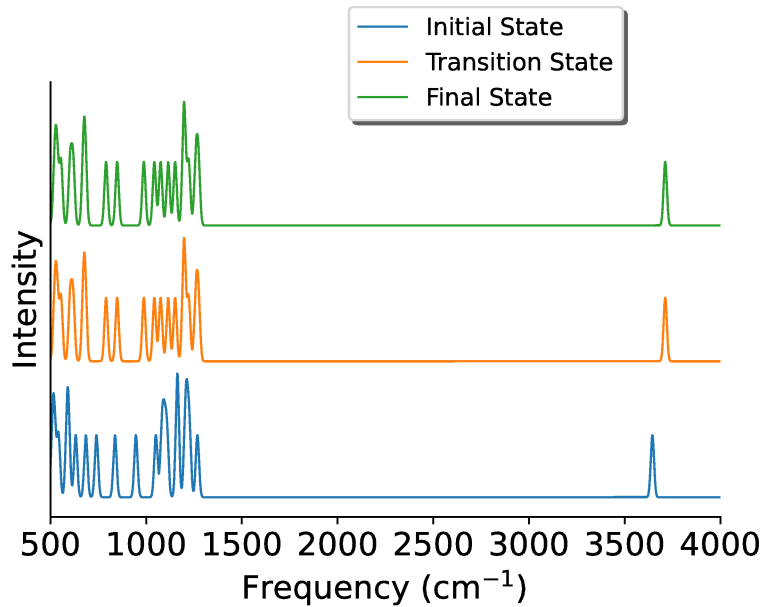

Figure S6: Vibrational spectra of the initial, transition, and final state for reaction **R9** in the carbo binding mode.

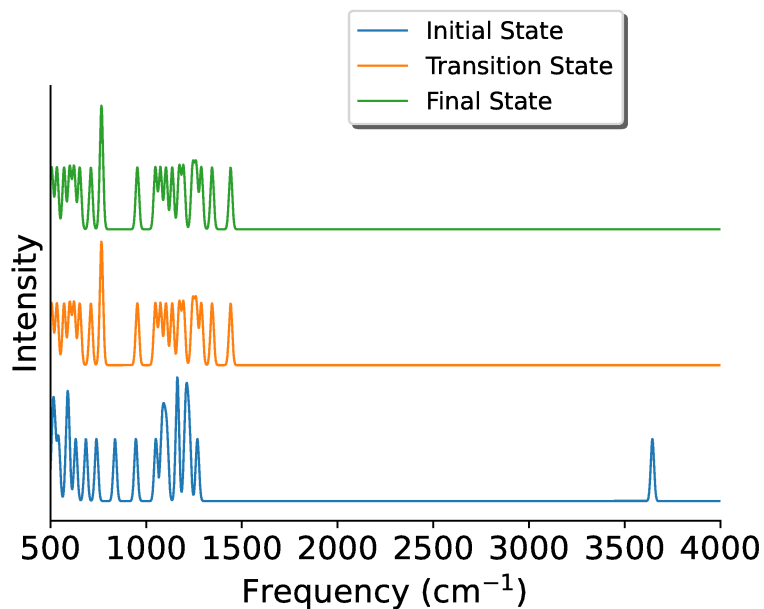

Figure S7: Vibrational spectra of the initial, transition, and final state for reaction **R10** in the carbo binding mode.



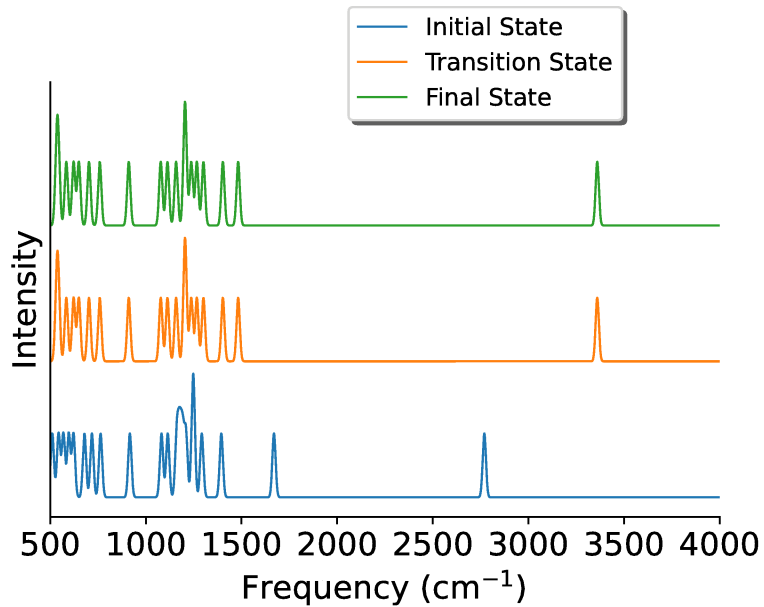

Figure S8: Vibrational spectra of the initial, transition, and final state for reaction **R2** in the flat binding mode.

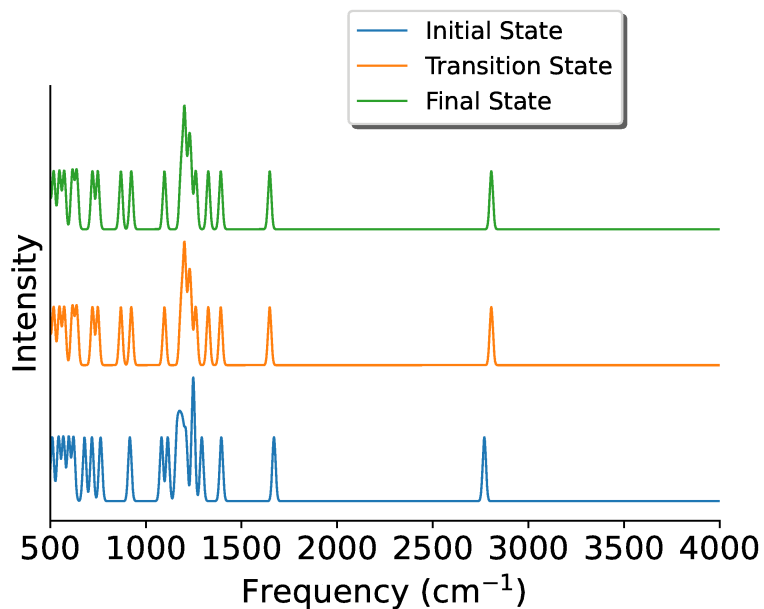

Figure S9: Vibrational spectra of the initial, transition, and final state for reaction **R3** in the flat binding mode.

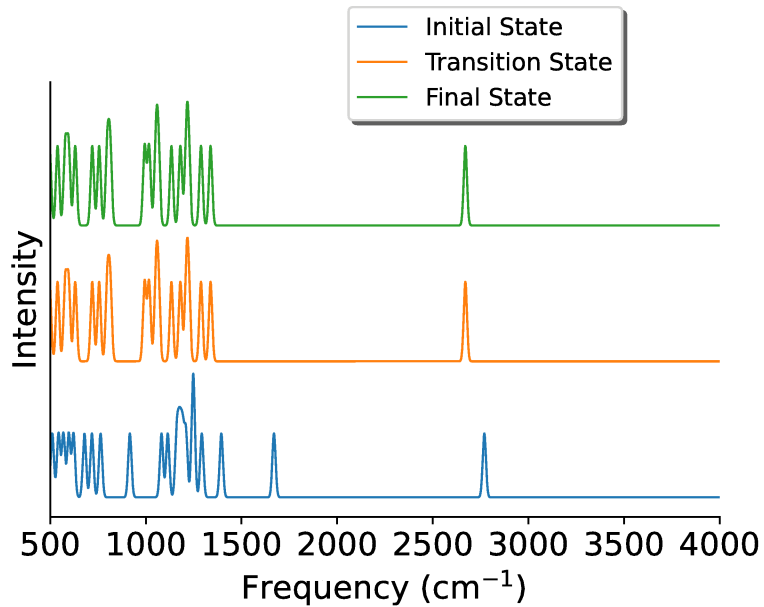

Figure S10: Vibrational spectra of the initial, transition, and final state for reaction **R4** in the flat binding mode.

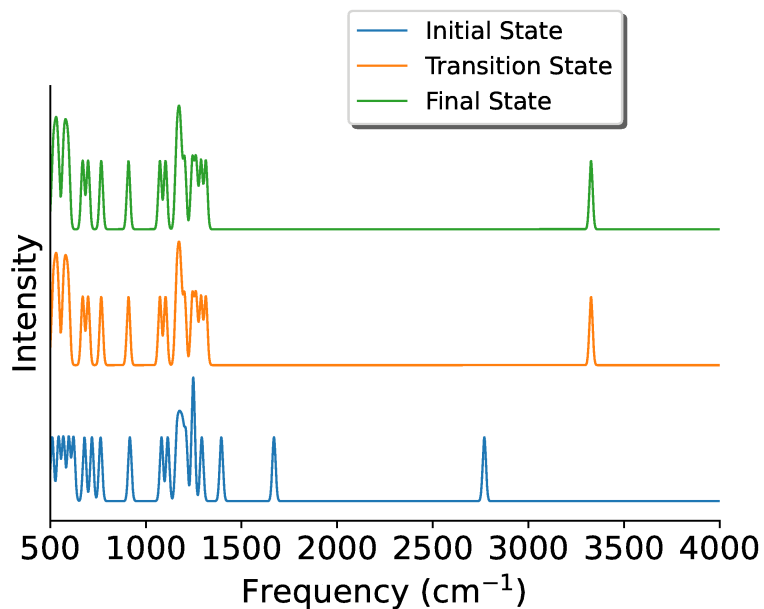

Figure S11: Vibrational spectra of the initial, transition, and final state for reaction **R5** in the flat binding mode.

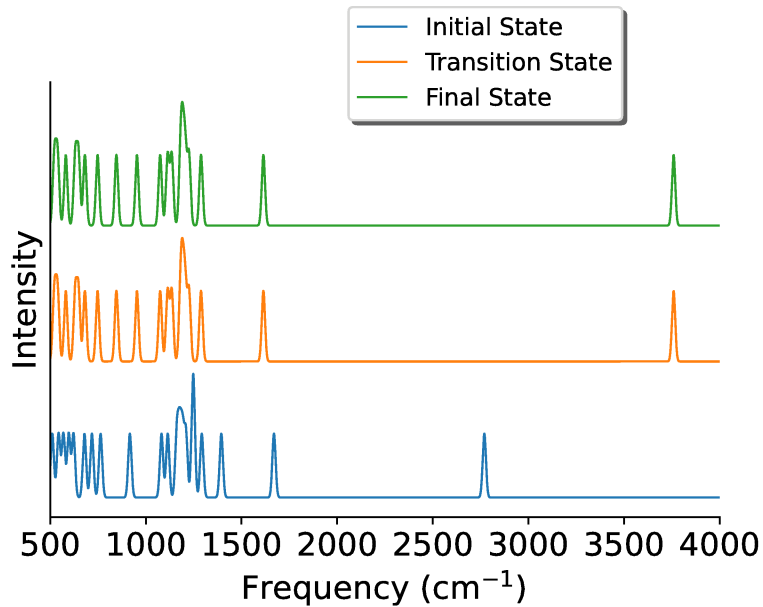

Figure S12: Vibrational spectra of the initial, transition, and final state for reaction **R6** in the flat binding mode.

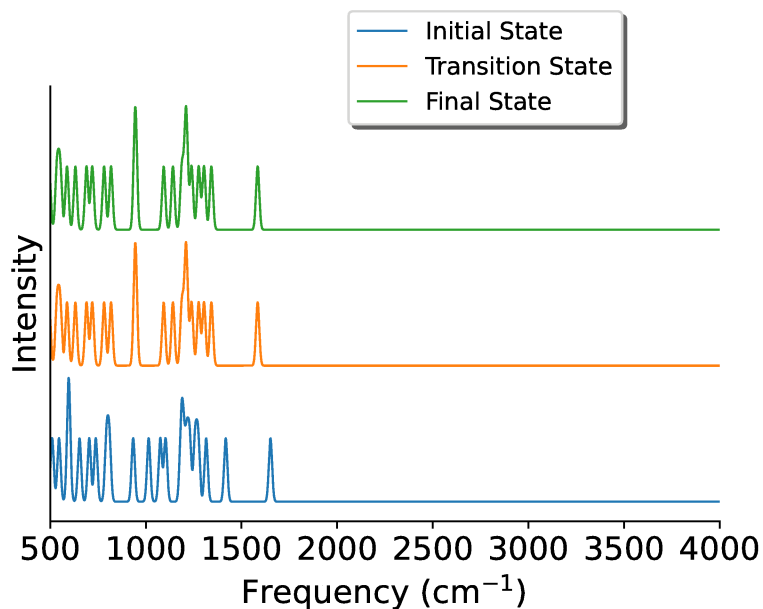

Figure S13: Vibrational spectra of the initial, transition, and final state for reaction **R8** in the flat binding mode.

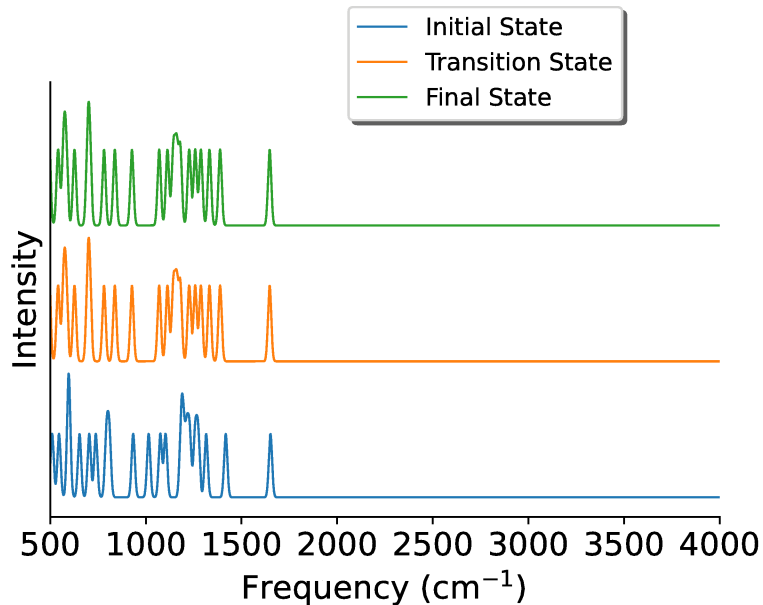

Figure S14: Vibrational spectra of the initial, transition, and final state for reaction **R8** in the flat binding mode.

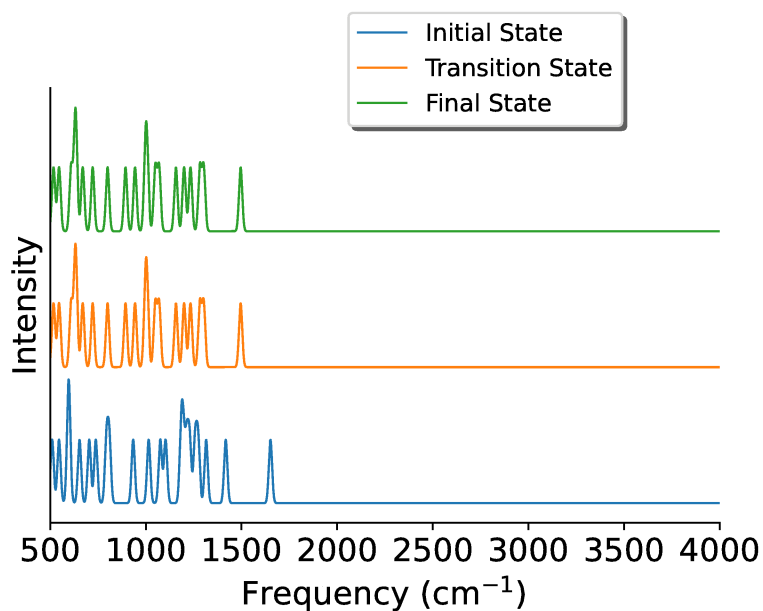

Figure S15: Vibrational spectra of the initial, transition, and final state for reaction **R9** in the flat binding mode.

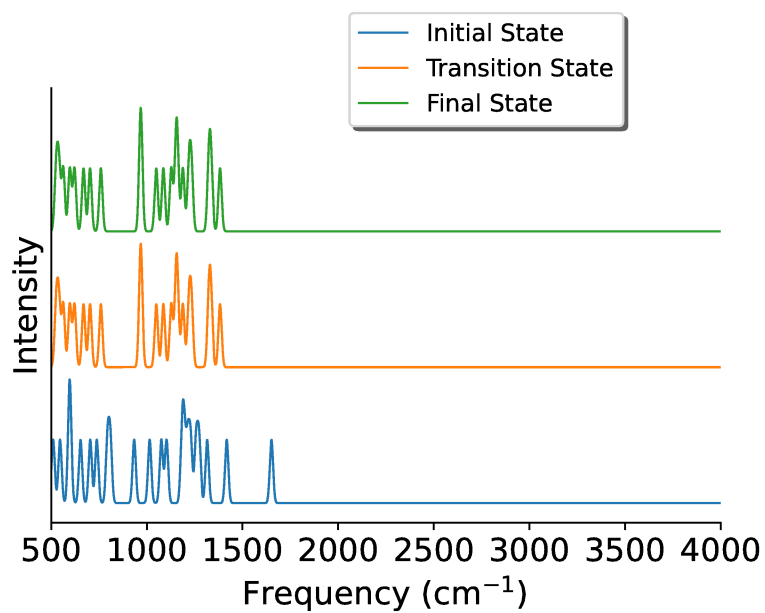

Figure S16: Vibrational spectra of the initial, transition, and final state for reaction **R10** in the flat binding mode.

### 3 XAS Spectra

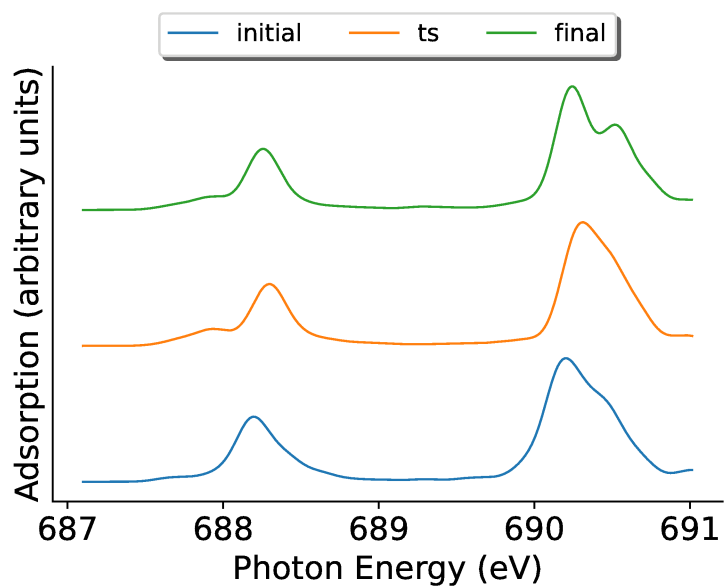

Figure S17: Fluorine *K*-edge XAS of the initial, transition, and final state for reaction **R1** in the carbo binding mode.

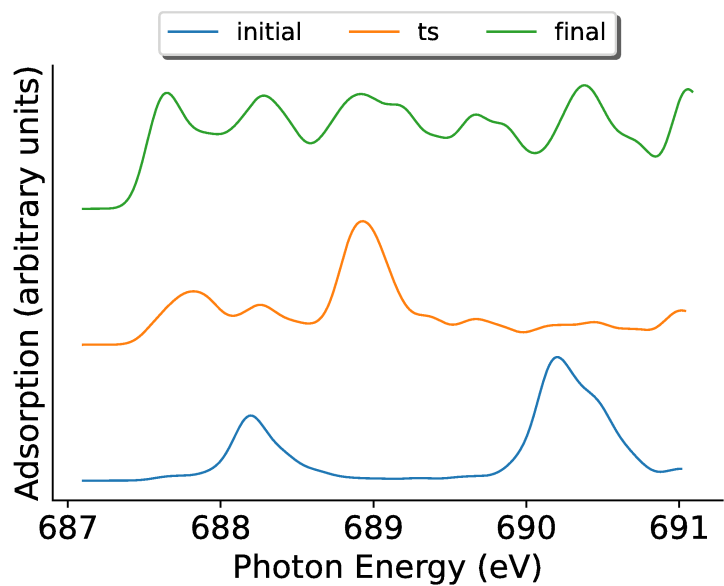

Figure S18: Fluorine *K*-edge XAS of the initial, transition, and final state for reaction **R2** in the carbo binding mode.

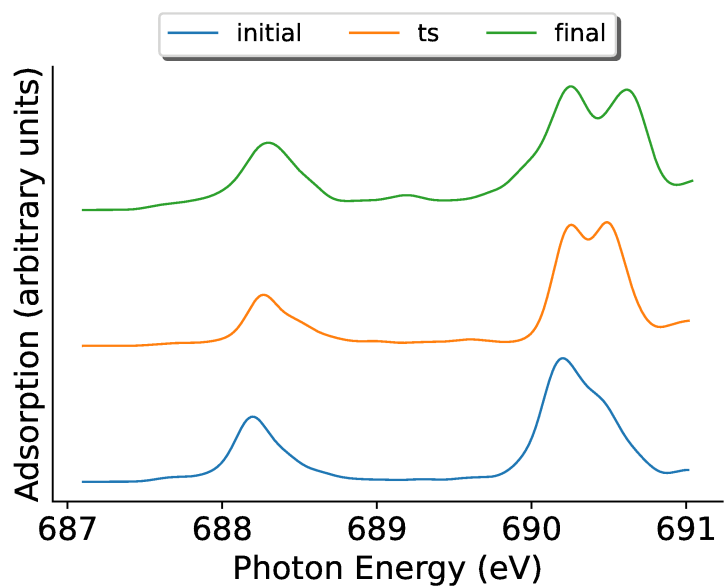

Figure S19: Fluorine *K*-edge XAS of the initial, transition, and final state for reaction **R4** in the carbo binding mode.

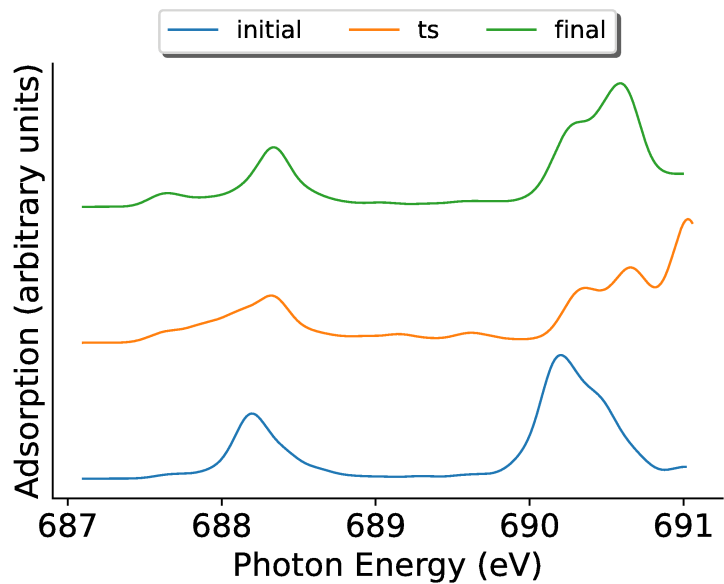

Figure S20: Fluorine *K*-edge XAS of the initial, transition, and final state for reaction **R5** in the carbo binding mode.

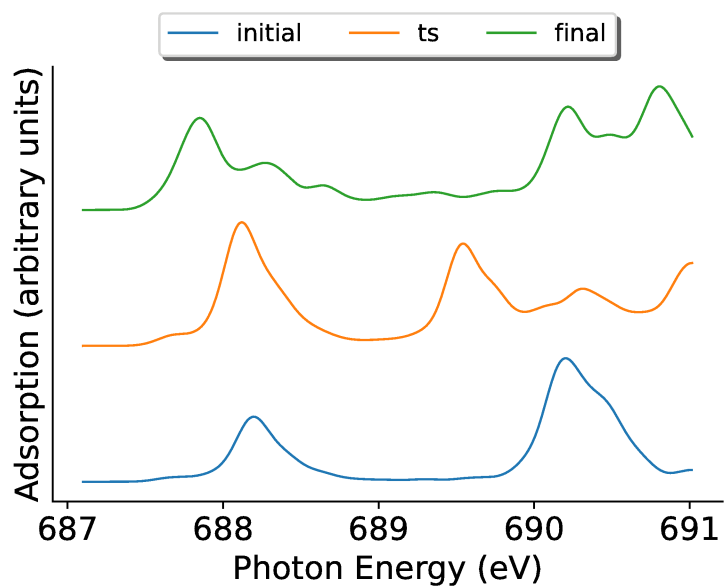

Figure S21: Fluorine *K*-edge XAS of the initial, transition, and final state for reaction **R6** in the carbo binding mode.

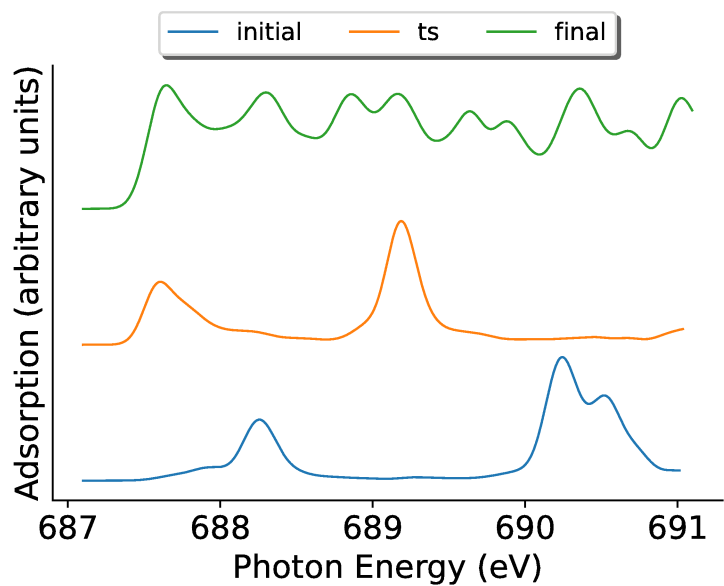

Figure S22: Fluorine *K*-edge XAS of the initial, transition, and final state for reaction **R7** in the carbo binding mode.



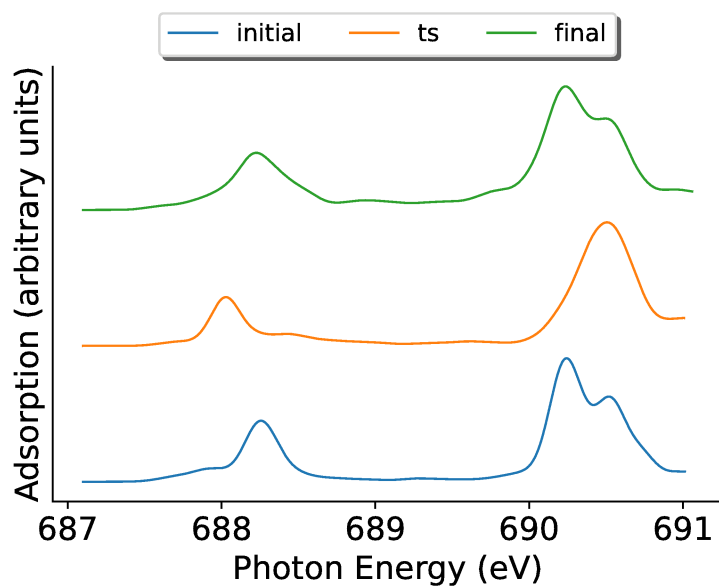

Figure S23: Fluorine *K*-edge XAS of the initial, transition, and final state for reaction **R9** in the carbo binding mode.

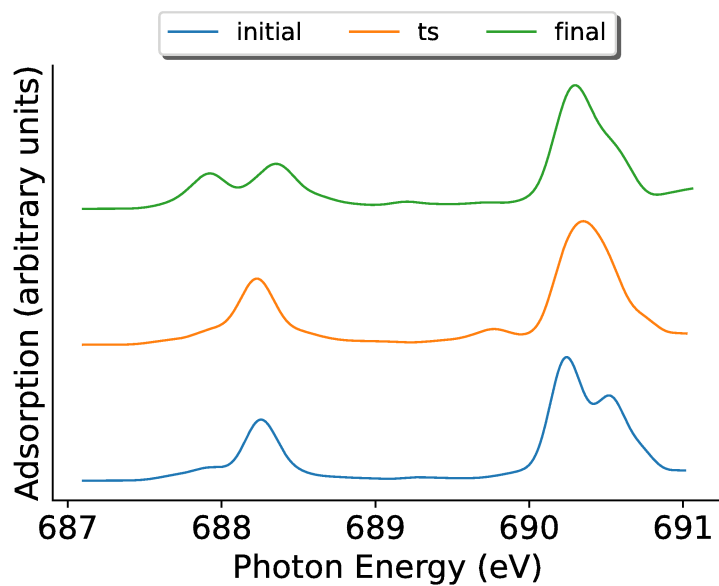

Figure S24: Fluorine *K*-edge XAS of the initial, transition, and final state for reaction **R10** in the carbo binding mode.

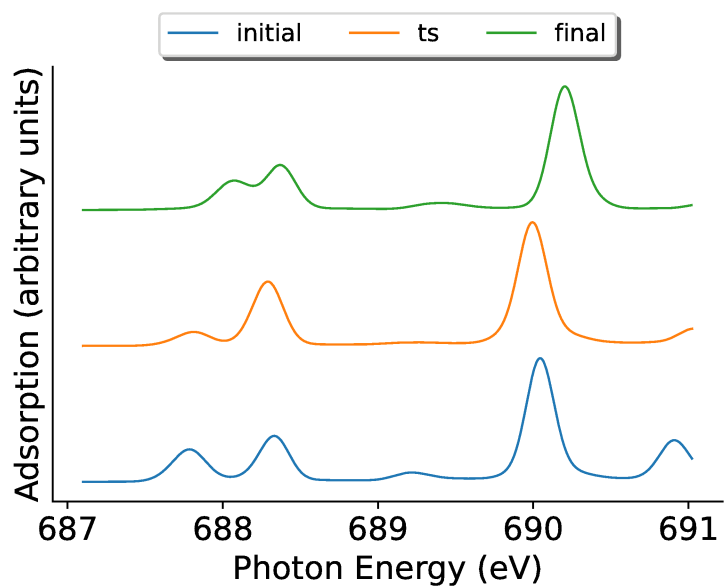

Figure S25: Fluorine *K*-edge XAS of the initial, transition, and final state for reaction **R1** in the flat binding mode.

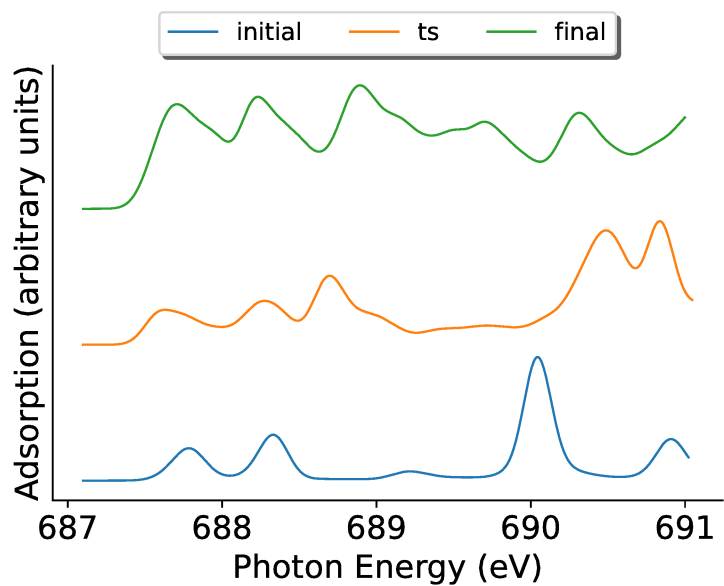

Figure S26: Fluorine *K*-edge XAS of the initial, transition, and final state for reaction **R2** in the flat binding mode.

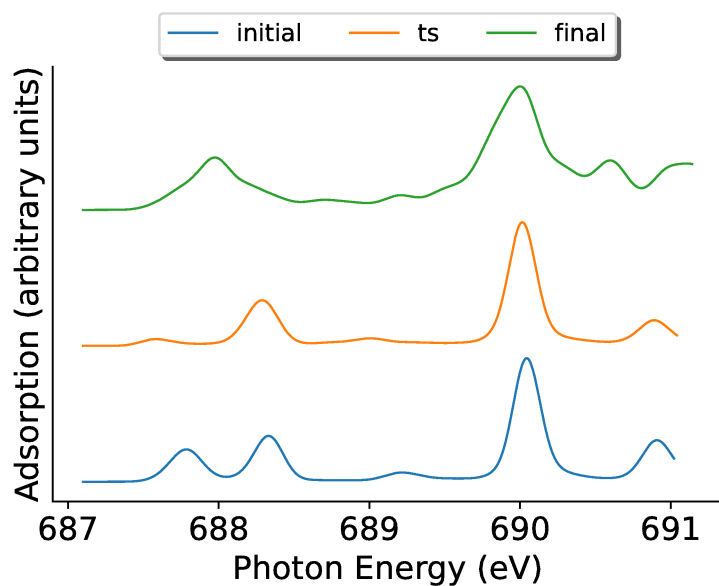

Figure S27: Fluorine *K*-edge XAS of the initial, transition, and final state for reaction **R3** in the flat binding mode.

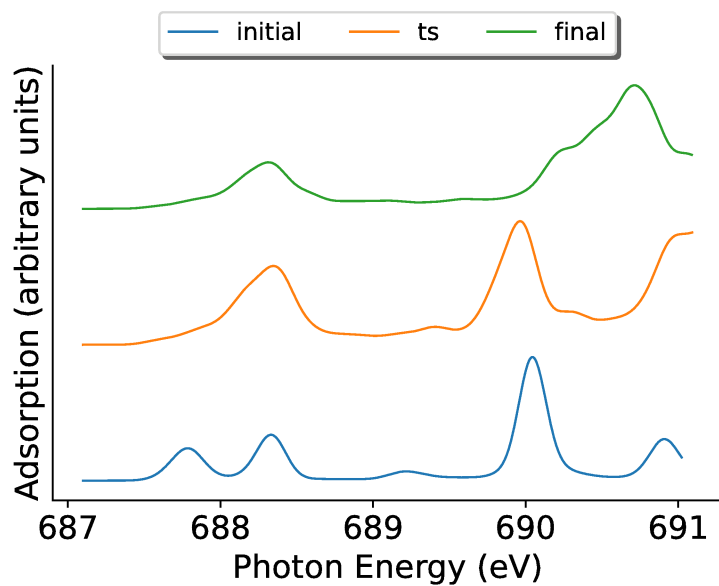

Figure S28: Fluorine *K*-edge XAS of the initial, transition, and final state for reaction **R4** in the flat binding mode.

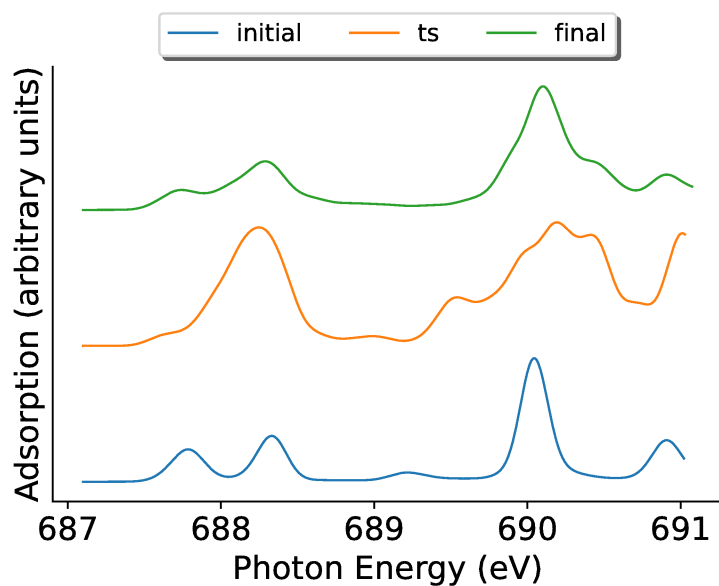

Figure S29: Fluorine *K*-edge XAS of the initial, transition, and final state for reaction **R5** in the flat binding mode.

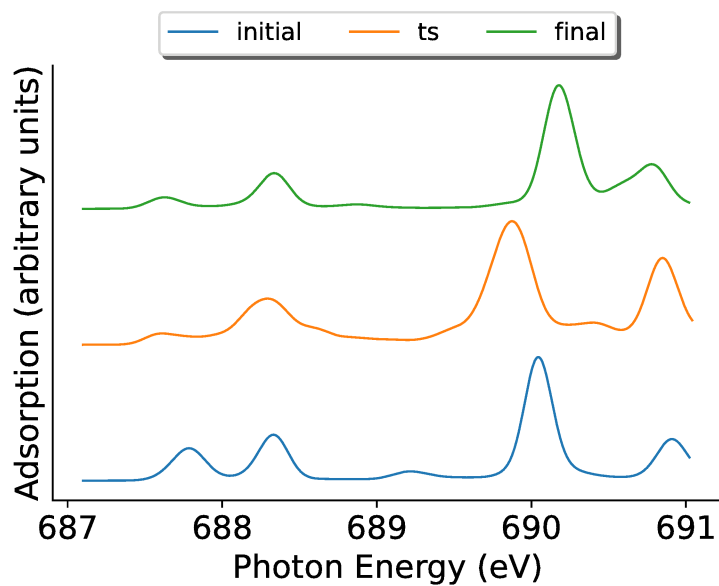

Figure S30: Fluorine *K*-edge XAS of the initial, transition, and final state for reaction **R6** in the flat binding mode.

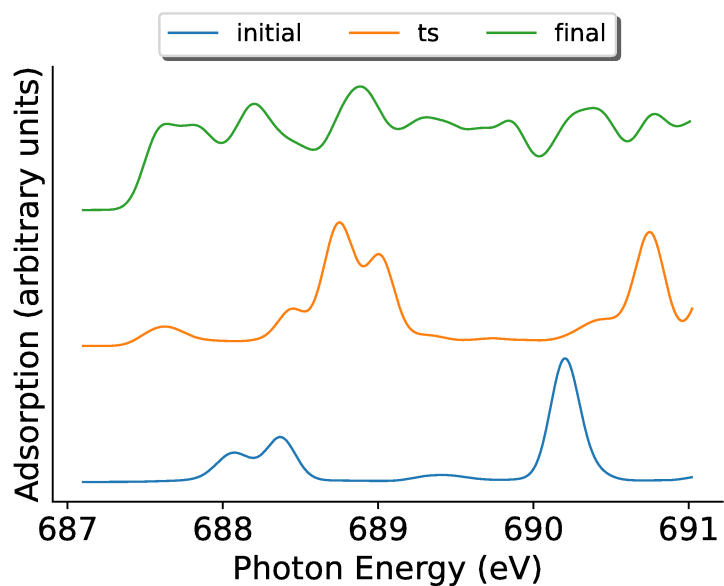

Figure S31: Fluorine *K*-edge XAS of the initial, transition, and final state for reaction **R7** in the flat binding mode.

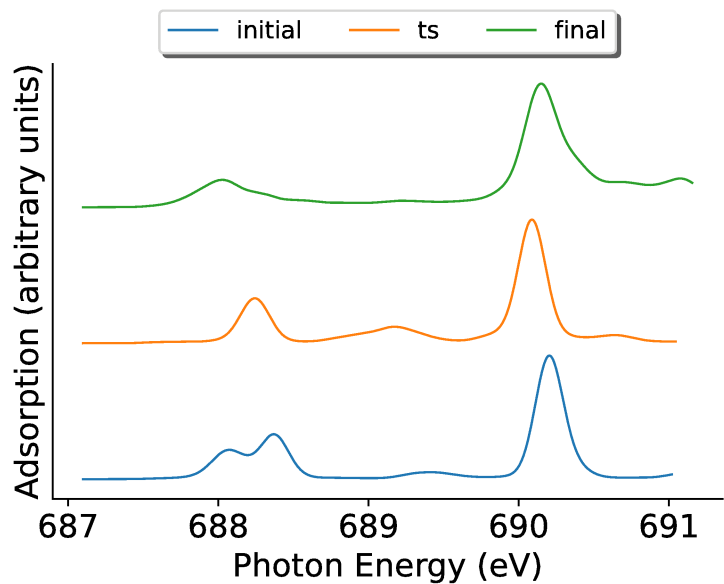

Figure S32: Fluorine *K*-edge XAS of the initial, transition, and final state for reaction **R8** in the flat binding mode.

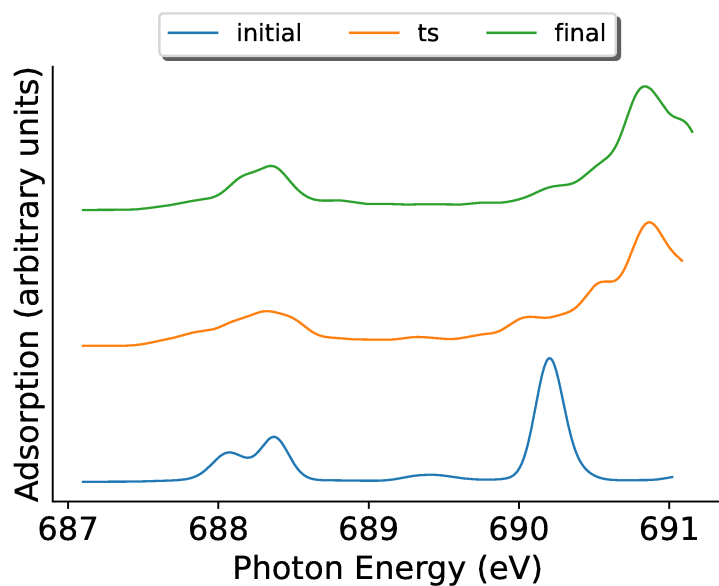

Figure S33: Fluorine *K*-edge XAS of the initial, transition, and final state for reaction **R9** in the flat binding mode.

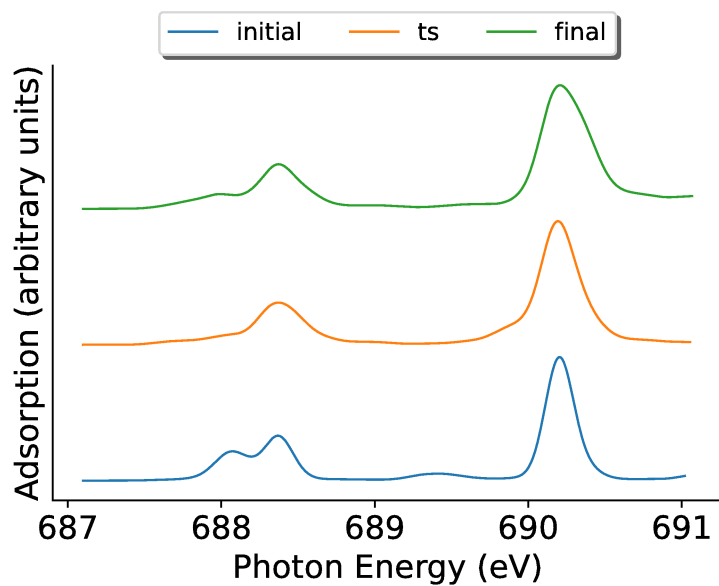

Figure S34: Fluorine *K*-edge XAS of the initial, transition, and final state for reaction **R10** in the flat binding mode.
